# Supplementary material for: An excitation mechanism for discrete chorus elements in themagnetosphere
Source: Copernicus journal article supplement (doi:10.5194/angeo-2018-38), 2018-05-24
Supplement: Supplementary file [file cover_letter.pdf › cover_letter.pdf]

Dear Natascha Tupfer, Copernicus Publications Editorial Support:

We re-submit a revised version of our article entitled "An excitation mechanism for discrete chorus elements in the magnetosphere" [No.: angeo-2018-38] for publication in Journal ANGIO (ANGIO Communicates). We also submit an itemized 'Author's response' to the comments offered by referee and 'Author's changes in manuscript' as part of 'Respond to all referee comments'. The issues raised by referees have been fully addressed in the revised version (highlighted and clean versions of the manuscript are presented) and in the response, and we thus hope that the paper will now be considered acceptable for publication.

We presented in this manuscript a new effective mechanism for the chorus excitation. These results are in demand in connection with new space projects. We hope for your positive decision.

Yours sincerely

Peter Bessalov

on behalf of the co-authors
